Downloaded from <http://aas2.silverchair.com/esthesiology/article-pdf/82/6/1536/387862/0000542-19950600-00006.pdf> by guest on 30 April 2022

**Fig. 1. 7**  
and the  
without  
justable

## CORRESPONDENCE

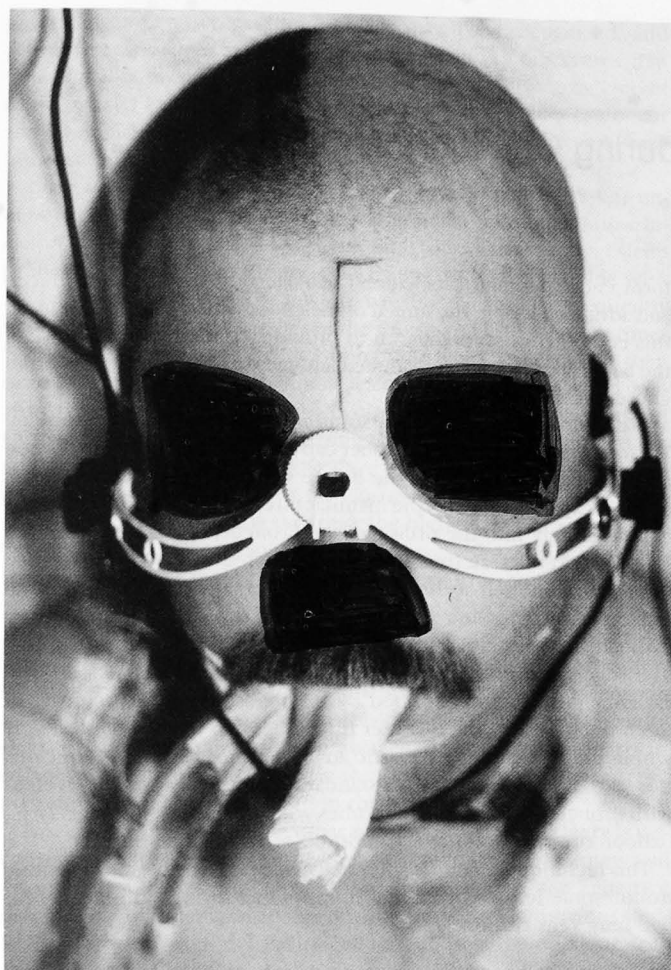

**Fig. 1.** The fixation frame viewed from above. The ear inserts and the foam-padded nose rest are used to anchor the frame without interfering with the potential surgical field. The adjustable Doppler transducers are mounted on the side-arms.

the direction of the artery segment being insonated. Many commercial fixation devices are available, all of which are based on a head-band or head-strap design. Although these devices are functional, they preclude use of the monitor in neurosurgical procedures, which is arguably the area where it can be most useful.

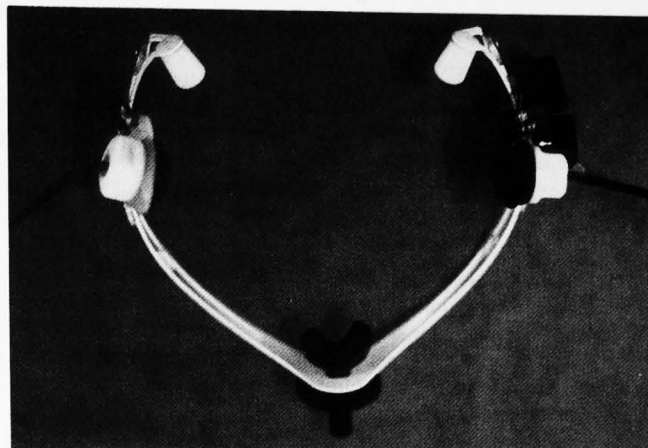

**Fig. 2.** The frame applied to a patient undergoing craniotomy for resection of a frontal-parietal arteriovenous malformation.

We wish to report our experiences with a custom-designed attachment system (in collaboration with DWL Electronics, Sipplingen, Germany) using ear inserts and a foam-padded nose rest to anchor the system, leaving the head unencumbered (figs. 1 and 2). The side-mounted transducers are equipped with swivel locks to fix the position, and the thumb wheel mounted on the nose rest allows alteration of tension to achieve optimal signals. With the exception of neurosurgical procedures using subtemporal incisions, its deployment causes no interference. We have used this system successfully for intraoperative monitoring in 12 cases with good results.

**Arthur M. Lam, M.D.**

Professor of Anesthesiology and Neurological Surgery  
University of Washington School of Medicine  
Department of Anesthesiology  
Harborview Medical Center  
325 Ninth Avenue, ZA-14  
Seattle, Washington 98104

### Reference

1. Eng CC, Lam AM, Newell DW, Byrd S: The diagnosis and management of a perianesthetic cerebral aneurysmal rupture with transcranial Doppler ultrasonography. *ANESTHESIOLOGY* 78:191-194, 1993

(Accepted for publication March 13, 1995.)
